# Supplementary material for: Designed nucleus penetrating thymine-capped dendrimers: a potential vehicle for intramuscular gene transfection
Source: Royal Society of Chemistry journal article supplement (doi:10.1039/c5tb01435b), 2015-01-01
Supplement: c5tb01435b1.pdf [file c5tb01435b1.pdf]

## Supporting Information

### Designed Nucleus Penetrating Thymine-Capped Dendrimers: A Potential Vehicle for Intramuscular Gene Transfection

Jia-Ying Yan, Chia-Yeh Liu, Zong-Wei Wu, Chih-Te Chien, Wan-Ching Chiu, and Shu-Yi Lin\*

Institute of Biomedical Engineering and Nanomedicine, National Health Research Institutes, 35 Keyan Road Zhunan, Miaoli 35053, Taiwan. E-mail: [971223@nhri.org.tw](mailto:971223@nhri.org.tw); Tel: +886-37-246166 ext. 38127

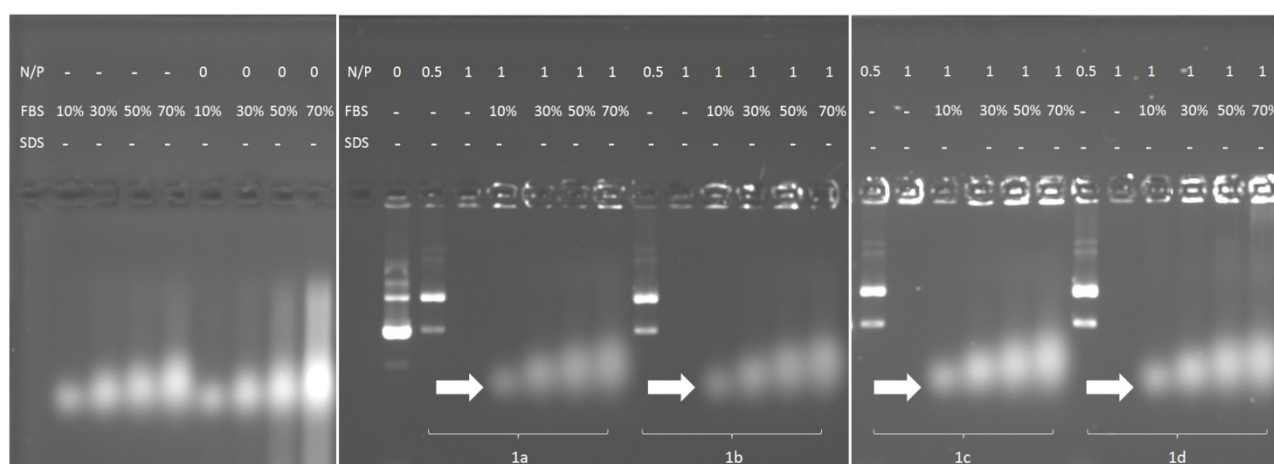

**Fig. S1** The serum tolerances of various polyplexes were evaluated. The white arrows indicate the serum signals rather than those of pDNA.

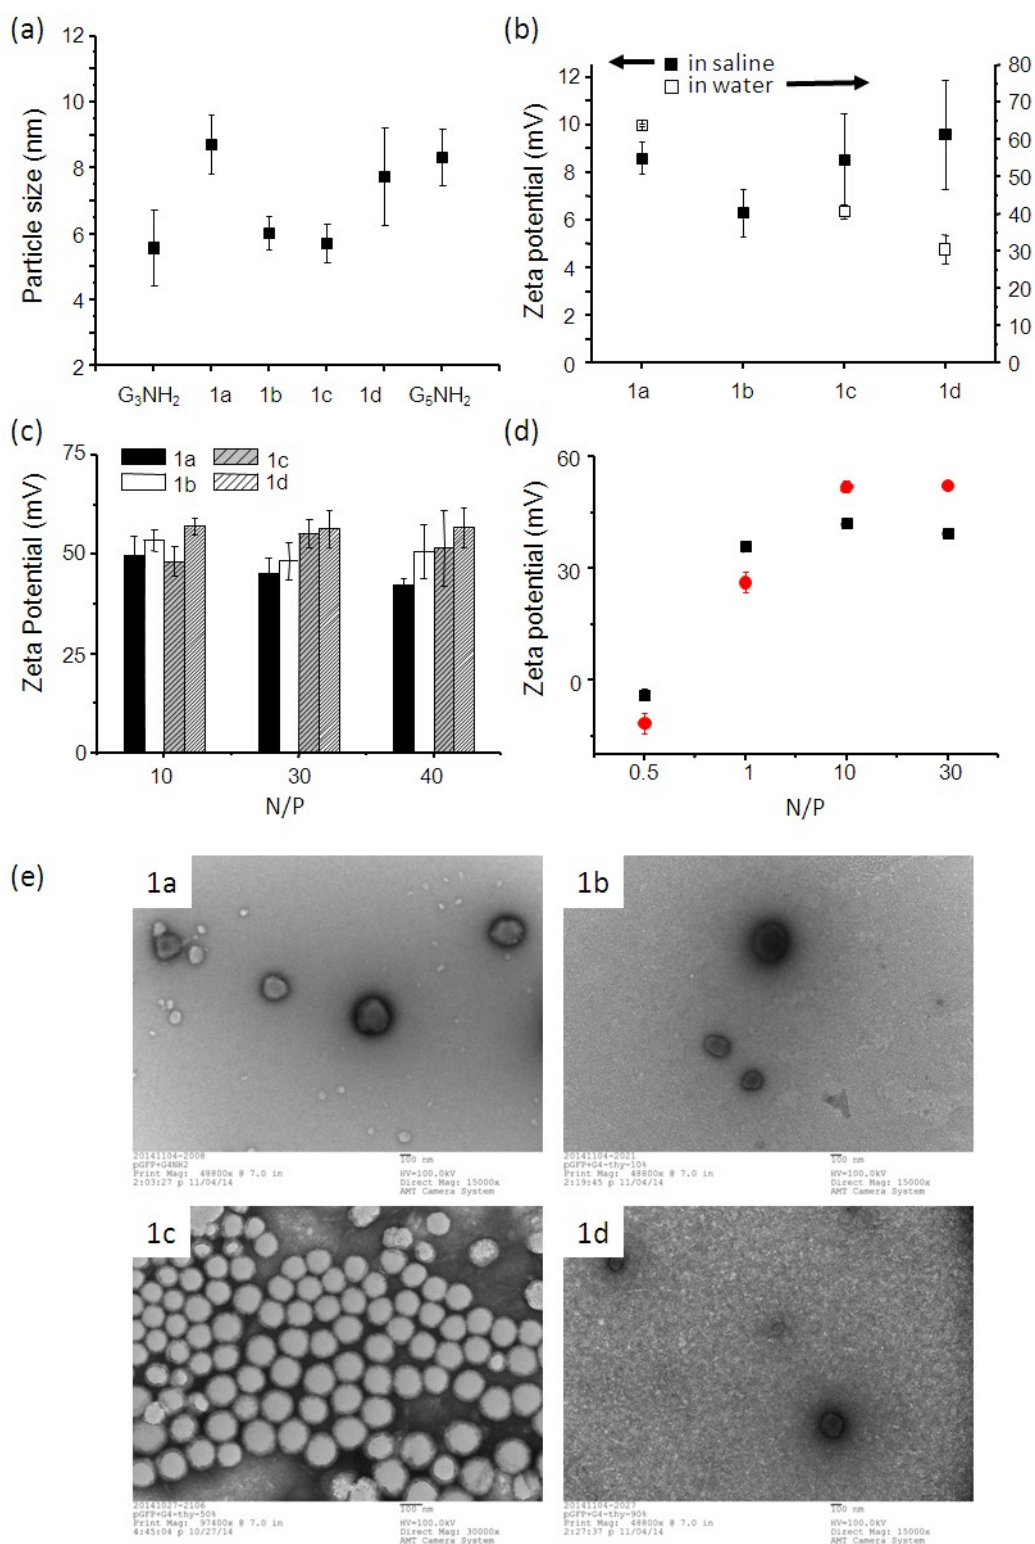

**Fig. S2** The dimensions and zeta potentials of compounds 1a~1d and polyplexes 1a~1d were measured by dynamic light scattering instrument and transmission electron microscopy (TEM). Note that panel (d) only shows the comparison of polyplex 1a (black square) and polyplex 1c (red circle).

**Transmission electron microscopy.** The polyplexes 1a~1d were mounted on a 400-mesh Cu grid and carbon support and stained with 2% uranyl acetate solution. Excess staining reagent was removed using a filter paper, and the grid was dried prior to transmission electron microscopy measurements (Hitachi H-7650, Japan) at 100 kV and field emission gun transmission electron microscopy measurements at 200keV (JEOL, JEM-2100F, Japan)

**Size and zeta potential measurements of compounds and polyplexes.** The sizes and zeta potentials were measured using a zetasizer nano system (Zetasizer Nano ZS, Malvern Instruments, Worcestershire, UK). All measurements were conducted at room temperature. Each parameter was measured in triplicate to fit the statistical analysis.
